# Supplementary material for: Transcriptome analysis of Acidovorax avenae subsp. avenae cultivated in vivo and co-culture with Burkholderia seminalis
Source: PubMed Central journal article supplement — Sci Rep. 2014 Jul 16;4:5698. doi: 10.1038/srep05698 (PMC4099980; doi:10.1038/srep05698), 2014-07-16

**Transcriptome analysis of *Acidovorax avenae* subsp. *avenae* cultivated *in vivo* and co-culture with *Burkholderia seminalis***

**Bin Li<sup>1†</sup>, Muhammad Ibrahim<sup>1†</sup>, Mengyu Ge<sup>1</sup>, Zhouqi Cui<sup>1</sup>, Guochang Sun<sup>2</sup>, Fei Xu<sup>3</sup>, Michael Kube<sup>4</sup>**

<sup>1</sup>State Key Laboratory of Rice Biology, Institute of Biotechnology, Zhejiang University, 310058, Hangzhou, China

<sup>2</sup>State Key Laboratory Breeding Base for Zhejiang Sustainable Plant Pest and Disease Control, Key Laboratory of Detection for Pesticide Residues, Ministry of Agriculture, Zhejiang Academy of Agricultural Sciences, Hangzhou 310021, China

<sup>3</sup>Institute of Digital Agriculture, Zhejiang Academy of Agricultural Sciences, Hangzhou 310021, China

<sup>4</sup>Faculty of Agriculture and Horticulture, Humboldt-Universität zu Berlin, 14195 Berlin, Germany

## Supplementary figure and table legends

### Figure S1.

Dendrograms and Heatmap of the top 50 differentially expressed genes in *Acidovorax avenae* subsp. *avenae* strain RS-1 under *in vitro*, *in vivo* and co-culture conditions. The plot shows two well segregated groups that correspond to Claudin and Luminal subtypes. In the heatmap, green represents low levels of expression while red represents high levels.

### Figure S2.

*In silico* prediction of genomic islands in strains RS-1 of *Acidovorax avenae* subsp. *avenae* by using IslandViewer software web server. Blue areas represent 7 putative genomic islands that contain 89 genes, while strain ATCC19860 was used as the guide reference.

### Figure S3.

The correlation between RNA-Seq expression data ( $\log_2$ ) and qRT-PCR data ( $\log_2$ ). (a) *in vivo* ( $P < 0.001$ ,  $r^2 = 0.78$ ); (b) co-culture ( $P < 0.001$ ,  $r^2 = 0.69$ ).

### Table S1.

List of specifically expressed genes under *in vivo* rice plant condition of *Acidovorax avenae* subsp. *avenae* strain RS-1 transcriptome.

**Table S2.**

Genome and transcriptome analyses of secretion systems in *Acidovorax avenae* subsp. *avenae* strain RS-1 by using strain ATCC19860 as the guide reference.

**Table S3.**

List of *in silico* predicted genomics islands and their individual genes based on genome and transcriptome data of *Acidovorax avenae* subsp. *avenae* strain ATCC19860 and RS-1.

**Table S4.**

List of genome-wide predicted ncRNAs verified by both RFAM database and RNA-Seq data of *Acidovorax avenae* subsp. *avenae* strain RS-1.

**Table S5.**

qRT-PCR analysis of T6SS genes expression in *Acidovorax avenae* subsp. *avenae* strain RS-1 under *in vivo* and co-culture conditions relative to the *in vitro* condition.

**Table S6.**

Primers of Type VI secretion system genes used for quantitative real-time PCR in *Acidovorax avenae* subsp. *avenae* strain RS-1.

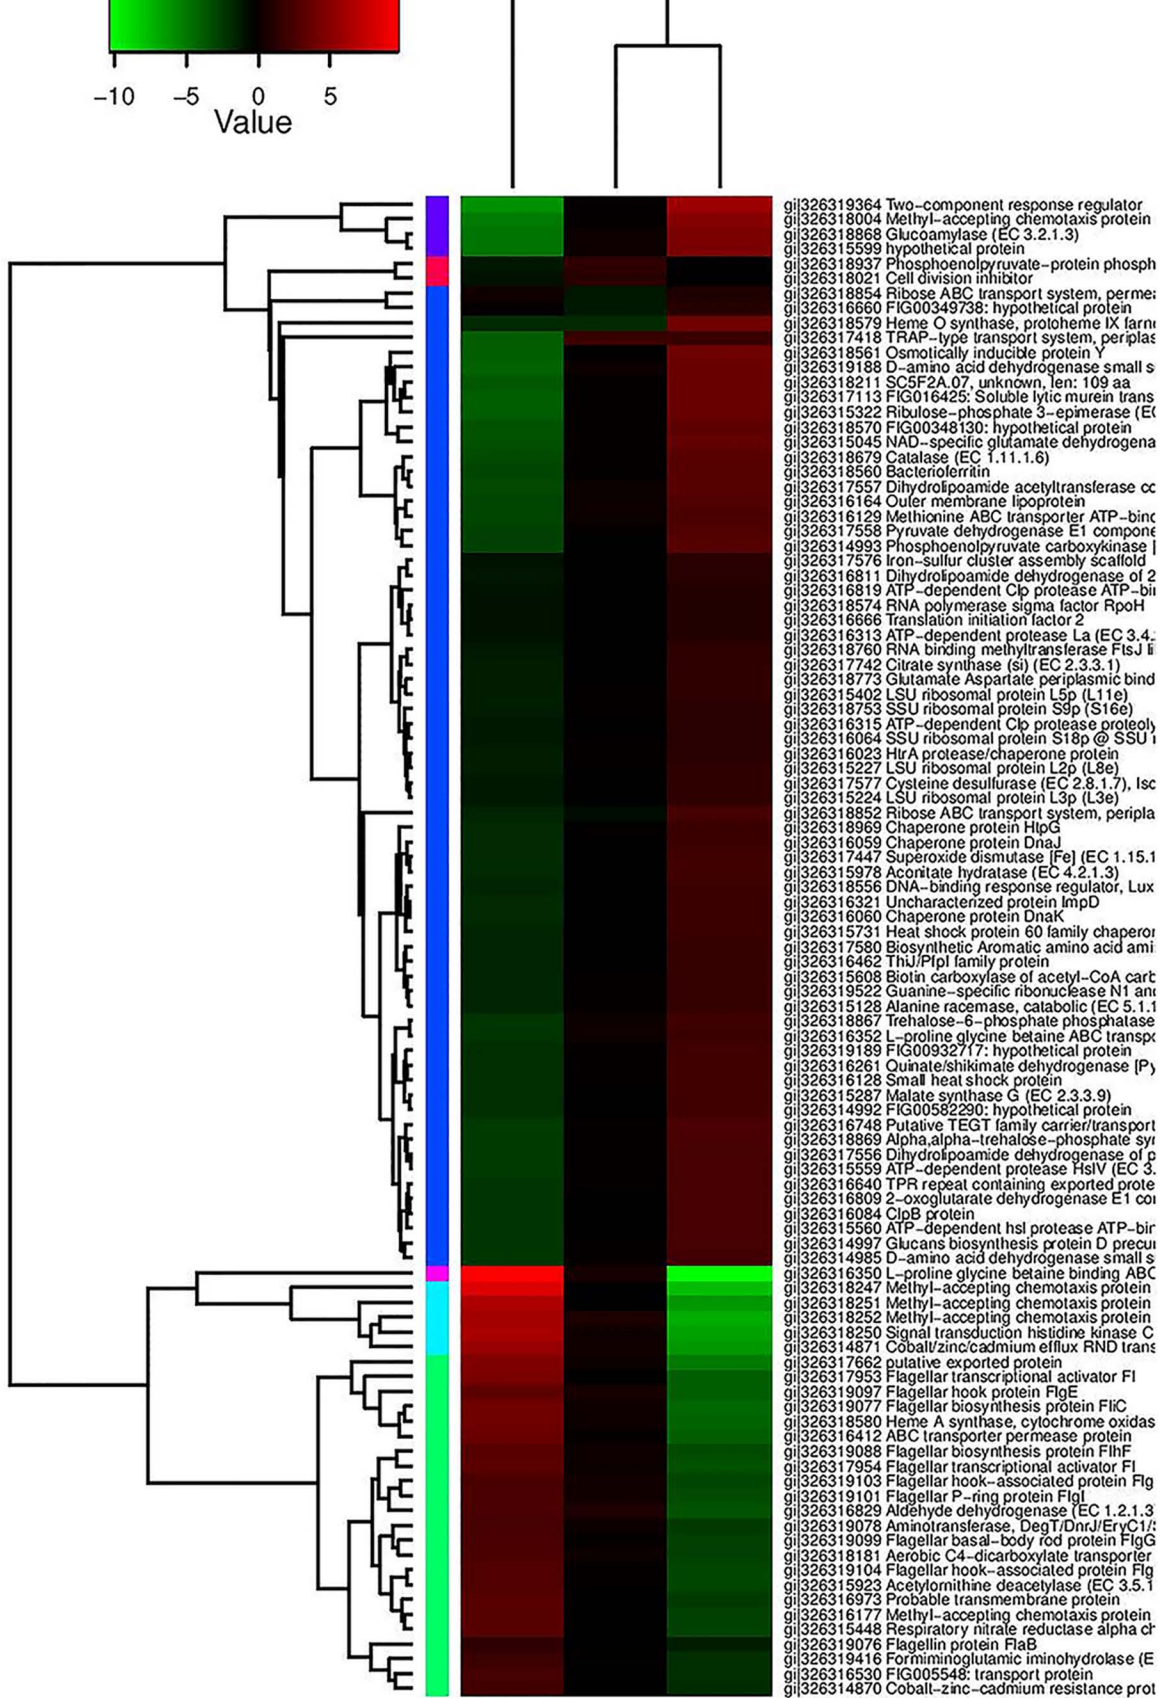

*In vivo vs. In vivo*

*In vitro vs. co-culture*

*In vivo vs. co-culture*

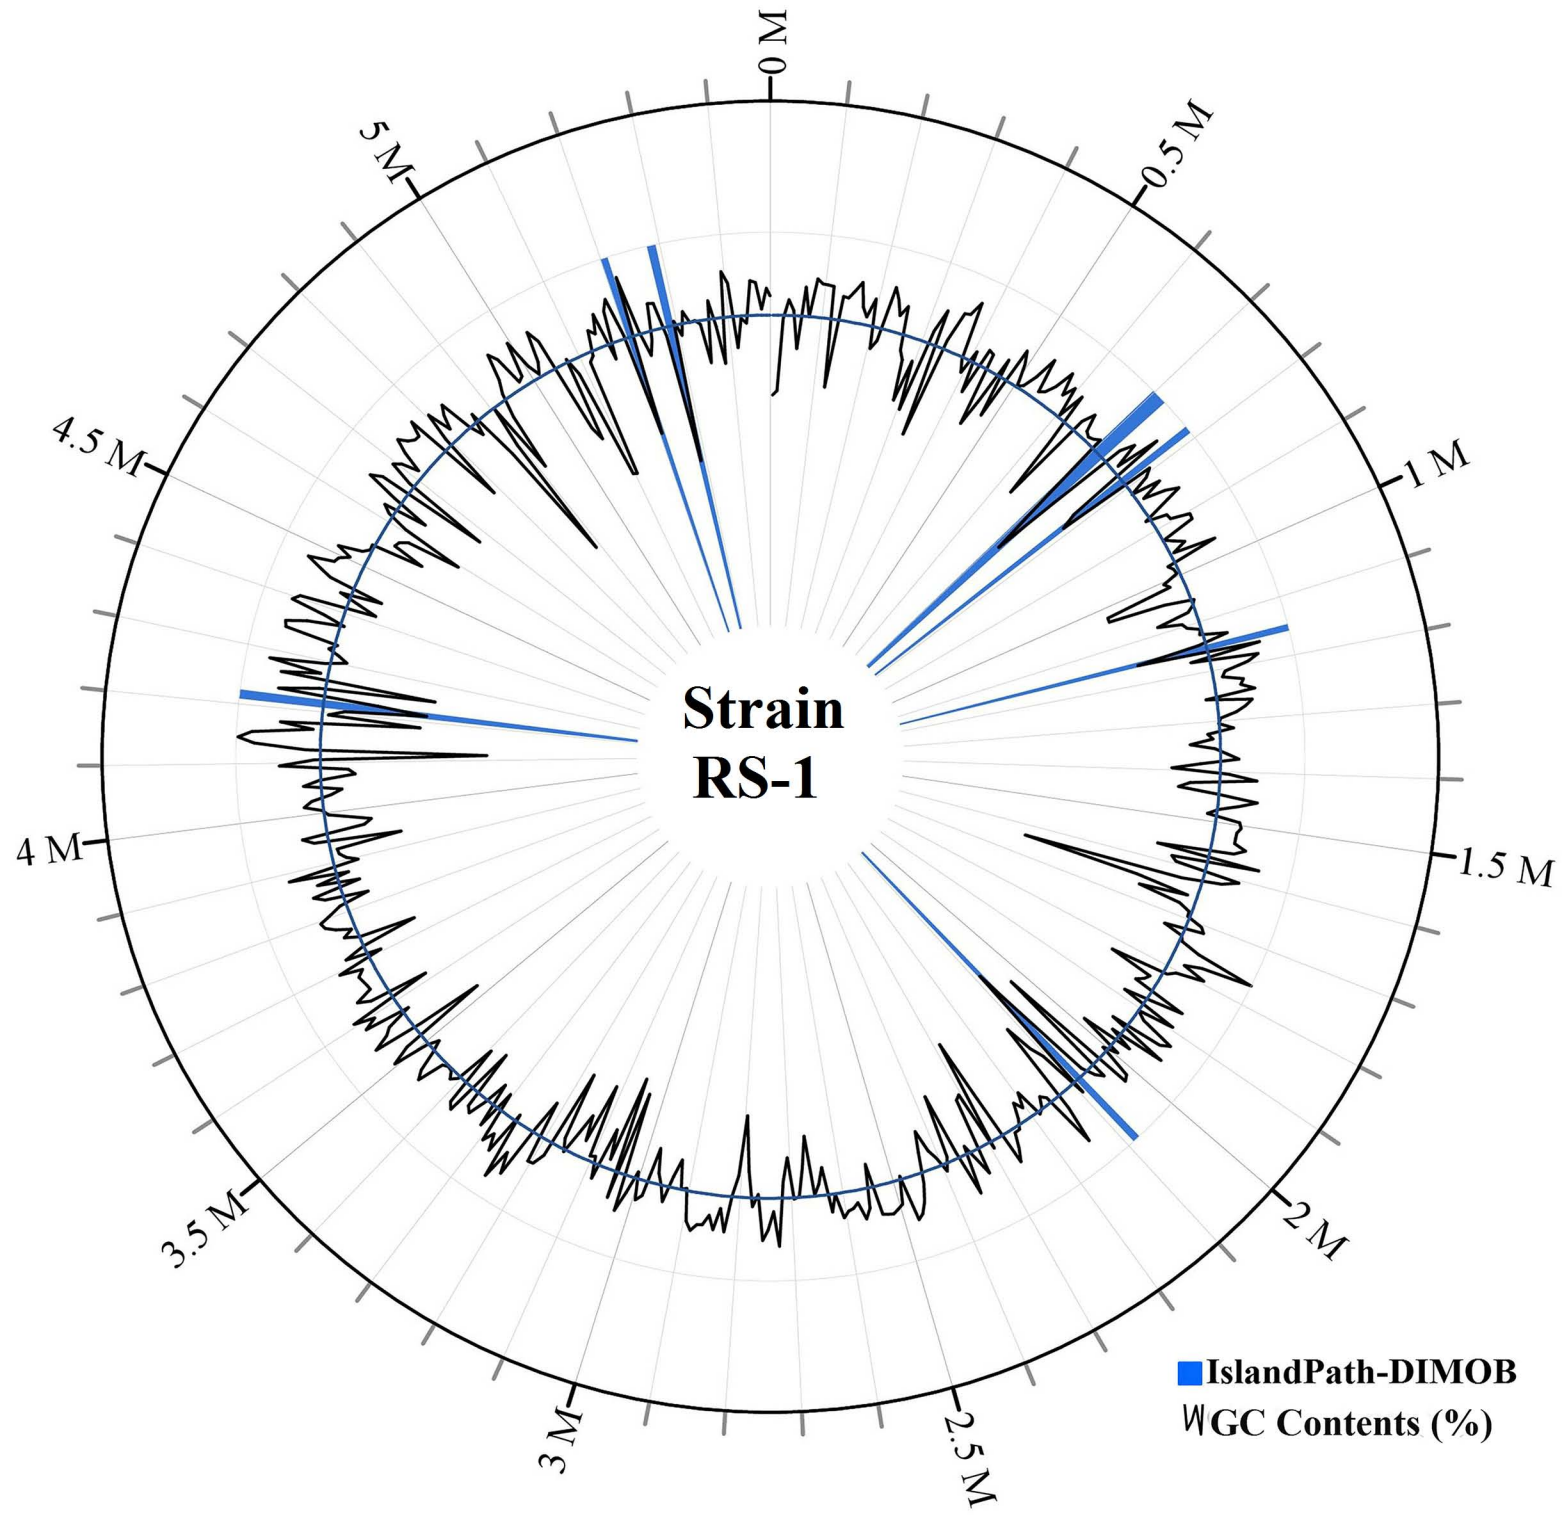

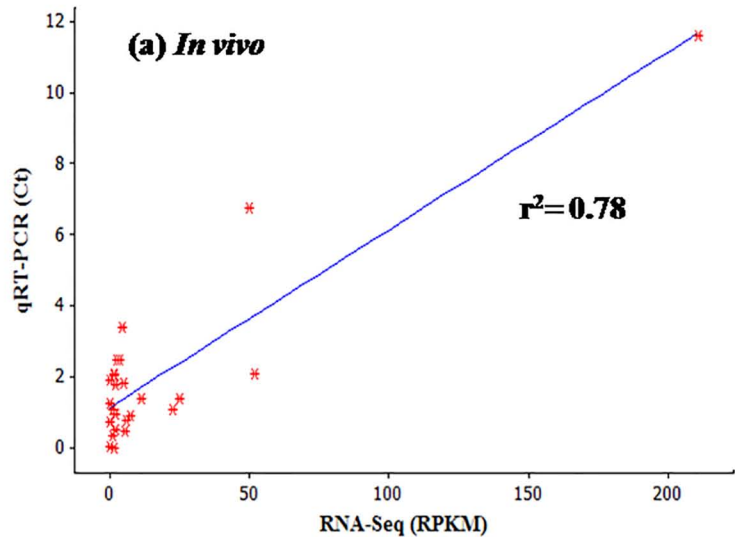

Supplement: srep05698-s1.pdf [file srep05698-s1.pdf]
